# Supplementary material
Source: PubMed Central journal article supplement (PMC6585508)

1 **Supplementary material**

2

3 Higher Temperatures Do Not Always Achieve Better Antibiotic Resistance Genes

4 Removal in Anaerobic Digestion of Swine Manure

5 Xu Huang<sup>a\*</sup>, Jialun Zheng<sup>a</sup>, Shaohua Tian<sup>a</sup>, Chaoxiang Liu<sup>a,b\*</sup>, Lin Liu<sup>a</sup>, Lili Wei<sup>a</sup>,

6 Hongyong Fan<sup>a</sup>, Tingfeng Zhang<sup>a</sup>, Lei Wang<sup>c</sup>, Gefu Zhu<sup>a</sup>

7 <sup>a</sup>Key Lab of Urban Pollutant Conversion, Institute of Urban Environment, Chinese

8 Academy of Sciences, Xiamen, 361021, China

9 <sup>b</sup>Ningbo Urban Environment Observation and Research Station, Chinese Academy of

10 Sciences, Ningbo, 315800, China

11 <sup>c</sup>College of Environment and Public Health, Xiamen Huaxia University, Xiamen,

12 361024, China

13

---

\* Corresponding author.

Email address: [xhuang@iue.ac.cn](mailto:xhuang@iue.ac.cn) (X. Huang); [cxliu@iue.ac.cn](mailto:cxliu@iue.ac.cn) (C.X. Liu)

14 Text 1 Determination of antibiotics

15 The concentrations of twelve antibiotics including OTC, SM2 and CIP in fresh  
16 manure were very low (ppb level). Thus, only the antibiotics in T37A were  
17 determined and shown in this study. After centrifuging at 10,000 g, antibiotics in  
18 supernatant and pellet of manure slurry were extracted and measured separately. The  
19 supernatant was mixed with pure methanol (v:v=1:4), filtered through 0.45 µm  
20 membrane before determination. Antibiotics in pellet were extracted using the  
21 mixture of phosphate buffer (pH=3.0) and acetonitrile (1:1, v/v). The extract was also  
22 mixed with methanol and filtered before further analysis. All the samples were  
23 determined in duplicate. Control samples and spiked samples were also manipulated  
24 to obtain the recoveries of antibiotics. Antibiotics were finally detected and quantified  
25 by LC-MS/MS system (ABI 6500 Q-TRAP, Applied Biosystems, USA). The volumes  
26 of supernatant and wet weights of pellet were also recorded. The total antibiotic  
27 concentrations in manure slurry were therefore calculated.

Table S1 Experimental design and chemical properties of samples collected from different treatments.

| #Sample ID | Temperature | Antibiotic spiking | Day | pH        | NO <sub>3</sub> <sup>-</sup> (mg/L) | NH <sub>4</sub> <sup>+</sup> (g/L) | TSS (g/L) | VSS (g/L) | VSS/TSS   |
|------------|-------------|--------------------|-----|-----------|-------------------------------------|------------------------------------|-----------|-----------|-----------|
| D0         | --          | No                 | 0   | 6.05±0.03 | 146.5±10.9                          | 1.18±0.07                          | 78.7±9.8  | 60.2±8.6  | 0.76±0.02 |
| T25,D14    | 25          | No                 | 14  | 5.92±0.01 | 133.6±20.8                          | 2.02±0.01                          | 55.5±7.2  | 42.0±5.7  | 0.75±0.01 |
| T25,D30    | 25          | No                 | 30  | 5.89±0.03 | 49.8±5.8                            | 2.18±0.14                          | 76.5±5.7  | 56.6±6.2  | 0.74±0.03 |
| T37,D14    | 37          | No                 | 14  | 5.50±0.00 | 120.3±89.5                          | 2.24±0.06                          | 60.5±15.6 | 43.8±13.0 | 0.72±0.03 |
| T37,D30    | 37          | No                 | 30  | 5.67±0.03 | 60.4±2.6                            | 2.44±0.07                          | 73.8±6.4  | 57.1±4.8  | 0.77±0.01 |
| T37A,D14   | 37          | Yes                | 14  | 5.49±0.01 | 126.4±57.8                          | 2.19±0.10                          | 45.7±7.1  | 33.8±5.5  | 0.74±0.01 |
| T37A,D30   | 37          | Yes                | 30  | 5.67±0.02 | 60.8±3.4                            | 2.36±0.02                          | 49.4±5.8  | 37.4±4.4  | 0.76±0.01 |
| T55,D14    | 55          | No                 | 14  | 6.10±0.10 | 105.6±16.0                          | 2.04±0.12                          | 65.3±14.4 | 49.8±11.3 | 0.76±0.02 |
| T55,D30    | 55          | No                 | 30  | 6.02±0.38 | 55.2±10.0                           | 2.23±0.14                          | 52.1±2.0  | 36.7±0.4  | 0.70±0.02 |

Table S2 ARG subtypes involved in network analysis according to fold change (FC) values of ARGs in samples of T37, T37A and T55 compared to that of T25 on day 30.

The ARGs with three FC values >1 and minimum C<sub>T</sub> value ≤ 21 are shown.

|                             | Assay                  | FC values compared to T25D30 |          |          | Maximum Relative abundance |
|-----------------------------|------------------------|------------------------------|----------|----------|----------------------------|
|                             |                        | T37D30                       | T37D30A  | T55D30   |                            |
| Aminoglycosides             | aac(6)-Ib(akaaacA4)-01 | 1.56                         | 1.26     | 2.44     | 9.67E-03                   |
|                             | aac(6)-Ib(akaaacA4)-02 | 1.40                         | 1.50     | 2.06     | 1.19E-02                   |
|                             | aac(6)-Ib(akaaacA4)-03 | 1.28                         | 1.27     | 1.52     | 1.33E-02                   |
|                             | aacC2                  | 1.42                         | 2.29     | 3.04     | 6.30E-03                   |
|                             | aadA-01                | 1.48                         | 1.56     | 1.62     | 5.12E-02                   |
|                             | aadA-02                | 1.46                         | 1.70     | 1.74     | 2.79E-02                   |
|                             | aadA1                  | 1.18                         | 1.34     | 1.01     | 2.98E-02                   |
|                             | aadA-1-01              | 1.51                         | 1.28     | 1.28     | 1.96E-01                   |
|                             | aadA-1-02              | 2.42                         | 2.23     | 2.48     | 4.03E-01                   |
|                             | aadA2-01               | 1.77                         | 1.33     | 1.28     | 3.15E-02                   |
|                             | aadA2-02               | 1.57                         | 1.88     | 1.62     | 3.58E-02                   |
|                             | aadA2-03               | 1.42                         | 1.81     | 1.70     | 4.62E-02                   |
|                             | aadD                   | 1.21                         | 717.96   | 594.32   | 6.00E-03                   |
|                             | aadE                   | 1.21                         | 59399.46 | 62752.03 | 1.38E-01                   |
|                             | strB                   | 1.08                         | 1.17     | 2.75     | 3.31E-02                   |
| Beta_Lactamas               | blaTEM                 | 3.69                         | 7.87     | 3.93     | 6.86E-03                   |
|                             | fox5                   | 339.31                       | 1.20     | 702.92   | 1.91E-03                   |
| (flor)/(chlor)/(am)phenicol | cmlA1-01               | 1.59                         | 2.92     | 1.70     | 7.03E-03                   |
|                             | cmlA1-02               | 1.56                         | 2.91     | 1.79     | 7.08E-03                   |
|                             | cmx(A)                 | 1.34                         | 1.11     | 1.68     | 9.56E-02                   |
|                             | floR                   | 1.09                         | 1.53     | 1.50     | 4.22E-02                   |
| MGEs                        | cIntI-1                | 1.21                         | 1.20     | 2620.64  | 7.45E-03                   |
|                             | intI1                  | 1.64                         | 1.83     | 1.74     | 2.24E-02                   |
|                             | tnpA-05                | 1.58                         | 3.05     | 2.95     | 1.63E-01                   |
| MLSB                        | ermB                   | 1.38                         | 1.35     | 4.32     | 1.91E-01                   |
|                             | ermT-01                | 1.83                         | 2.11     | 4.83     | 3.69E-01                   |
|                             | ermT-02                | 1.32                         | 1.54     | 3.24     | 1.93E-01                   |
|                             | lnuB-01                | 1.74                         | 1.57     | 2.43     | 4.70E-02                   |
|                             | lnuB-02                | 1.81                         | 1.51     | 2.40     | 5.65E-02                   |
|                             | mphA-01                | 1.21                         | 1.20     | 1040.61  | 2.15E-03                   |
|                             | vatE-01                | 1.06                         | 1.17     | 4.83     | 1.52E-01                   |
|                             | vatE-02                | 1.16                         | 1.74     | 8.87     | 2.03E-01                   |
| Multidrug                   | qacEdelta1-01          | 1.42                         | 1.21     | 1.39     | 5.13E-02                   |
|                             | qacEdelta1-02          | 1.38                         | 1.27     | 1.54     | 7.15E-02                   |
|                             | qacH-01                | 1.21                         | 1798.88  | 869.82   | 3.91E-03                   |
|                             | qacH-02                | 1.99                         | 2.72     | 2.64     | 1.33E-03                   |
| Sulfonamides                | dfrA1                  | 2.13                         | 1.67     | 4.86     | 6.10E-03                   |
|                             | dfrA12                 | 1.97                         | 3.16     | 1.75     | 2.99E-03                   |
|                             | sul2                   | 1.23                         | 1.38     | 1.81     | 4.27E-02                   |
| Tetracyclines               | tet(32)                | 1.32                         | 1.25     | 5.04     | 4.93E-01                   |
|                             | tetG-02                | 1.35                         | 1.33     | 1.50     | 2.03E-02                   |
|                             | tetH                   | 2.26                         | 1.19     | 5.65     | 1.51E-03                   |
|                             | tetL-02                | 1.53                         | 1.64     | 5.84     | 2.65E-02                   |
|                             | tetM-02                | 1.17                         | 1.49     | 2.64     | 2.98E-02                   |
| tetQ                        | 10.77                  | 13.10                        | 1.74     | 1.99E-01 |                            |
| Other                       | sat4                   | 1.58                         | 1.21     | 1.62     | 5.18E-02                   |

Table S3 Characteristics of microbial genera significantly correlated with over 10 ARGs in network analysis.

| Genera                     | Belong to             | Maximum frequency | Number of correlated genes | Range of correlation efficiencies ( $\rho$ ) | Number of strong correlation ( $\rho > 0.8$ ) | ARGs they strongly correlated with ( $\rho > 0.8$ )        |
|----------------------------|-----------------------|-------------------|----------------------------|----------------------------------------------|-----------------------------------------------|------------------------------------------------------------|
| 1 <i>Dorea</i>             | <i>Firmicutes</i>     | 0.16%             | 20                         | 0.496-0.856                                  | 6                                             | ermB, ermT-01, ermT-02, tet(32), tetL-02, vatE-01          |
| 2 <i>Streptococcus</i>     | <i>Firmicutes</i>     | 40.42%            | 16                         | 0.499-0.919                                  | 7                                             | ermB, ermT-01, ermT-02, tet(32), tetL-02, vatE-01, vatE-02 |
| 3 <i>Dokdonella</i>        | <i>Proteobacteria</i> | 0.01%             | 15                         | 0.515-0.803                                  | 1                                             | vatE-02                                                    |
| 4 <i>Ruminococcus</i>      | <i>Firmicutes</i>     | 0.29%             | 15                         | 0.495-0.874                                  | 6                                             | ermB, ermT-02, tet(32), tetL-02, vatE-01, vatE-02          |
| 5 <i>Proteiclasticum</i>   | <i>Firmicutes</i>     | 0.02%             | 14                         | 0.487-0.717                                  | 0                                             |                                                            |
| 6 <i>Eubacterium</i>       | <i>Firmicutes</i>     | 0.60%             | 14                         | 0.495-0.822                                  | 1                                             | vatE-01                                                    |
| 7 <i>Lactobacillus</i>     | <i>Firmicutes</i>     | 8.39%             | 14                         | 0.506-0.873                                  | 6                                             | ermB, ermT-02, tet(32), tetL-02, vatE-01, vatE-02          |
| 8 <i>Azomonas</i>          | <i>Proteobacteria</i> | 0.38%             | 14                         | 0.498-0.752                                  | 0                                             |                                                            |
| 9 <i>Bacillus</i>          | <i>Firmicutes</i>     | 0.27%             | 14                         | 0.515-0.770                                  | 0                                             |                                                            |
| 10 <i>Rummeliibacillus</i> | <i>Firmicutes</i>     | 0.51%             | 13                         | 0.512-0.811                                  | 1                                             | vatE-01                                                    |
| 11 <i>Hydrogenophaga</i>   | <i>Proteobacteria</i> | 0.07%             | 13                         | 0.493-0.591                                  | 0                                             |                                                            |
| 12 <i>Wohlfahrtiimonas</i> | <i>Proteobacteria</i> | 0.08%             | 13                         | 0.500-0.611                                  | 0                                             |                                                            |
| 13 <i>Anaerococcus</i>     | <i>Firmicutes</i>     | 0.08%             | 12                         | 0.507-0.821                                  | 1                                             | ermT-02                                                    |
| 14 <i>Peptococcus</i>      | <i>Firmicutes</i>     | 0.07%             | 11                         | 0.489-0.836                                  | 4                                             | ermB, ermT-02, tetL-02, vatE-01                            |
| 15 <i>Facklamia</i>        | <i>Firmicutes</i>     | 0.09%             | 11                         | 0.521-0.800                                  | 0                                             |                                                            |
| 16 <i>Luteimonas</i>       | <i>Proteobacteria</i> | 0.06%             | 11                         | 0.519-0.646                                  | 0                                             |                                                            |
| 17 <i>Oscillospira</i>     | <i>Firmicutes</i>     | 0.36%             | 11                         | 0.509-0.800                                  | 0                                             |                                                            |

Table S4 Primer list used in this study

| Gene Name                | Forward Primer          | Reverse Primer                | Classification | Mechanism  |
|--------------------------|-------------------------|-------------------------------|----------------|------------|
| 16S rRNA                 | GGGTTGCGCTCGTTGC        | ATGGYTGTCGTCAGCTCGTG          |                |            |
| aac                      | CCCTGCGTTGTGGCTATGT     | TTGGCCACGCCAATCC              | Aminoglycoside | deactivate |
| aac(6')I1                | GACCGGATTAAGGCCGATG     | CTTGCCTTGATATTCAGTTTTTATAACCA | Aminoglycoside | deactivate |
| aac(6')-Ib(aka aacA4)-01 | GTTTGAGAGGCAAGGTACCGTAA | GAATGCCTGGCGTGTTTGA           | Aminoglycoside | deactivate |
| aac(6')-Ib(aka aacA4)-02 | CGTCGCCGAGCAACTTG       | CGGTACCTTGCCTCTCAAACC         | Aminoglycoside | deactivate |
| aac(6')-Ib(aka aacA4)-03 | AGAAGCACGCCCGACACTT     | GCTCTCCATTACAGCATTGCA         | Aminoglycoside | deactivate |
| aac(6')-II               | CGACCCGACTCCGAACAA      | GCACGAATCCTGCCTTCTCA          | Aminoglycoside | deactivate |
| aac(6')-Iy               | GCTTTGCGGATGCCTCAAT     | GGAGAACAAAAATACCTTCAAGGAAA    | Aminoglycoside | deactivate |
| aacA/aphD                | AGAGCCTTGGGAAGATGAAGTTT | TTGATCCATACCATAGACTATCTCATCA  | Aminoglycoside | deactivate |
| aacC                     | CGTCACTTATTCGATGCCCTTAC | GTCGGGCGCGGCATA               | Aminoglycoside | deactivate |
| aacC1                    | GGTCGTGAGTTCGGAGACGTA   | GCAAGTTCCCGAGGTAATCG          | Aminoglycoside | deactivate |
| aacC2                    | ACGGCATTCTCGATTGCTTT    | CCGAGCTTACGTAAGCATTT          | Aminoglycoside | deactivate |
| aacC4                    | CGGCGTGGGACACGAT        | AGGGAACCTTTGCCATCAACT         | Aminoglycoside | deactivate |
| aadA-01                  | GTTGTGCACGACGACATCATT   | GGCTCGAAGATACCTGCAAGAA        | Aminoglycoside | deactivate |
| aadA-02                  | CGAGATTCTCCGCGTGTA      | GCTGCCATTCTCAAATTGC           | Aminoglycoside | deactivate |
| aadA1                    | AGCTAAGCGGAACTGCAAT     | TGGCTCGAAGATACCTGCAA          | Aminoglycoside | deactivate |
| aadA-1-01                | AAAAGCCCGAAGAGGAACTTG   | CATCTTTCACAAAGATGTTGCTGTCT    | Aminoglycoside | deactivate |
| aadA-1-02                | CGGAATTGAAAAAACTGATCGAA | ATACCGGCTGTCCGTCATTT          | Aminoglycoside | deactivate |
| aadA2-01                 | ACGGCTCCGCAGTGGAT       | GGCCACAGTAACCAACAAATCA        | Aminoglycoside | deactivate |
| aadA2-02                 | CTTGTCGTGCATGACGACATC   | TCGAAGATACCCGCAAGAATG         | Aminoglycoside | deactivate |
| aadA2-03                 | CAATGACATTCTTGCGGGTATC  | GACCTACCAAGGCAACGCTATG        | Aminoglycoside | deactivate |
| aadA5-01                 | ATCACGATCTTGCGATTTTGCT  | CTGCGGATGGGCCTAGAAG           | Aminoglycoside | deactivate |

|                 |                              |                                |                |            |
|-----------------|------------------------------|--------------------------------|----------------|------------|
| aadA5-02        | GTTCTTGCTCTTGCTCGCATT        | GATGCTCGGCAGGCAAAC             | Aminoglycoside | deactivate |
| aadA9-01        | CGCGGCAAGCCTATCTTG           | CAAATCAGCGACCGCAGACT           | Aminoglycoside | deactivate |
| aadA9-02        | GGATGCACGCTTGGATGAA          | CCTCTAGCGGCCGGAGTATT           | Aminoglycoside | deactivate |
| aadD            | CCGACAACATTTCTACCATCCTT      | ACCGAAGCGCTCGTCGTATA           | Aminoglycoside | deactivate |
| aadE            | TACCTTATTGCCCTTGAAGAGTTA     | GGAACTATGTCCCTTTTAATTCTACAATCT | Aminoglycoside | deactivate |
| aph             | TTTCAGCAAGTGGATCATGTAAAAT    | CCAAGCTGTTTCCACTGTTTTTC        | Aminoglycoside | deactivate |
| aph(2')-Id-01   | TGAGCAGTATCATAAGTTGAGTGAAAAG | GACAGAACAATCAATCTCTATGGAATG    | Aminoglycoside | deactivate |
| aph(2')-Id-02   | TAAGGATATACCGACAGTTTTGGAAA   | TTTAATCCCTCTTCATACCAATCCATA    | Aminoglycoside | deactivate |
| aph6ia          | CCCATCCCATGTGTAAGGAAA        | GCCACCGCTTCTGCTGTAC            | Aminoglycoside | deactivate |
| aphA1(aka kanR) | TGAACAAGTCTGGAAAGAAATGCA     | CCTATTAATTTCCCCTCGTCAAAAA      | Aminoglycoside | deactivate |
| speN-01         | AAAAGTTCGATGAAACACGCCTAT     | TCCAGTGGTAGTCCCCGAATC          | Aminoglycoside | deactivate |
| speN-02         | CAGAATCTTCCTGAAAAGTTTGATGAA  | CGCAGACACGCCGAATC              | Aminoglycoside | deactivate |
| str             | AATGAGTTTTGGAGTGTCTCAACGTA   | AATCAAAACCCCTATTAAGCCAAT       | Aminoglycoside | deactivate |
| strA            | CCGGTGGCATTTGAGAAAAA         | GTGGCTCAACCTGCGAAAAG           | Aminoglycoside | deactivate |
| strB            | GCTCGGTCGTGAGAACAATCT        | CAATTTCCGGTCGCCTGGTAGT         | Aminoglycoside | deactivate |
| ampC/blaDHA     | TGGCCGCAGCAGAAAAGA           | CCGTTTTATGCACCCAGGAA           | Beta_Lactamase | deactivate |
| ampC-01         | TGGCGTATCGGGTCAATGT          | CTCCACGGGCCAGTTGAG             | Beta_Lactamase | deactivate |
| ampC-02         | GCAGCACGCCCGTAA              | TGTACCCATGATGCGCGTACT          | Beta_Lactamase | deactivate |
| ampC-04         | TCCGGTGACGCGACAGA            | CAGCACGCCGGTAAAAGT             | Beta_Lactamase | deactivate |
| ampC-05         | CTGTTTCGAGCTGGGTTCTATAAGTAAA | CAGTATCTGGTCAACCGGATCGT        | Beta_Lactamase | deactivate |
| ampC-06         | CCGCTCAAGCTGGACCATAC         | CCATATCCTGCACGTTGGTTT          | Beta_Lactamase | deactivate |
| ampC-07         | CCGCCCAGAGCAAGGACTA          | GCTCGACTTCACGCCGTAAG           | Beta_Lactamase | deactivate |
| ampC-09         | CAGCCGCTGATGAAAAAATATG       | CAGCGAGCCCACTTCGA              | Beta_Lactamase | deactivate |
| bla1            | GCAAGTTGAAGCGAAAAGAAAAGA     | TACCAGTATCAATCGCATATACACCTAA   | Beta_Lactamase | deactivate |
| bla-ACC-1       | CACACAGCTGATGGCTTATCTAAAA    | AATAAACGCGATGGGTTCCA           | Beta_Lactamase | deactivate |

|                  |                            |                              |                |            |
|------------------|----------------------------|------------------------------|----------------|------------|
| blaCMY           | CCGCGGCGAAATTAAGC          | GCCACTGTTTGCCTGTCAGTT        | Beta_Lactamase | deactivate |
| blaCMY2-01       | AAAGCCTCAT GGGTGCATAAA     | ATAGCTTTTGTGGCCAGCATCA       | Beta_Lactamase | deactivate |
| blaCMY2-02       | GCGAGCAGCCTGAAGCA          | CGGATGGGCTTGTCTCTT           | Beta_Lactamase | deactivate |
| blaCTX-M-01      | GGAGGCGTGACGGCTTTT         | TTCAGTGCATCCAGACGAA          | Beta_Lactamase | deactivate |
| blaCTX-M-02      | GCCGCGGTGCTGAAGA           | ATCGGATTATAGTTAACCAGGTCAGATT | Beta_Lactamase | deactivate |
| blaCTX-M-03      | CGATACCACCACGCCGTTA        | GCATTGCCCAACGTCAGATT         | Beta_Lactamase | deactivate |
| blaCTX-M-04      | CTTGGCGTTGCGCTGAT          | CGTTCATCGGCACGGTAGA          | Beta_Lactamase | deactivate |
| blaCTX-M-05      | GCGATAACGTGGCGATGAAT       | GTCGAGACGGAACGTTTCGT         | Beta_Lactamase | deactivate |
| blaCTX-M-06      | CACAGTTGGTGACGTGGCTTAA     | CTCCGCTGCCGGTTTTATC          | Beta_Lactamase | deactivate |
| blaGES           | GCAATGTGCTCAACGTTCAAG      | GTGCCTGAGTCAATTCTTTCAAAG     | Beta_Lactamase | deactivate |
| blaIMP-01        | AACACGGTTTGGTGGTTCTTGTA    | GCGCTCCACAAACCAATTG          | Beta_Lactamase | deactivate |
| blaIMP-02        | AAGGCAGCATTTCCTCTCATTTT    | GGATAGATCGAGAATTAAGCCACTCT   | Beta_Lactamase | deactivate |
| bla-L1           | CACCGGGTTACCAGCTGAAG       | GCGAAGCTGCGCTTGTAGTC         | Beta_Lactamase | deactivate |
| blaMOX/blaCMY    | CTATGTCAATGTGCCGAAGCA      | GGCTTGTCTCTTTCGAATAGC        | Beta_Lactamase | deactivate |
| blaOCH           | GGCGACTTGCGCCGTAT          | TTTTCTGCTCGGCCATGAG          | Beta_Lactamase | deactivate |
| blaOKP           | GCCGCCATCACCATGAG          | GGTGACGTTGTCACCGATCTG        | Beta_Lactamase | deactivate |
| blaOXA1/blaOXA30 | CGGATGGTTTGAAGGGTTTATTAT   | TCTTGGCTTTTATGCTTGATGTTAA    | Beta_Lactamase | deactivate |
| blaOXA10-01      | CGCAATTATCGGCCTAGAACT      | TTGGCTTTCCTGCCATTT           | Beta_Lactamase | deactivate |
| blaOXA10-02      | CGCAATTATCGGCCTAGAACT      | TTGGCTTTCCTGCCATTT           | Beta_Lactamase | deactivate |
| blaOXY           | CGTTCAGGCGGCAGGTT          | GCCGCGATATAAGATTTGAGAATT     | Beta_Lactamase | deactivate |
| blaPAO           | CGCCGTACAACCGGTGAT         | GAAGTAATGCGGTTCTCCTTTCA      | Beta_Lactamase | deactivate |
| blaPER           | TGCTGGTTGCTGTTTTTGTGA      | CCTGCGCAATGATAGCTTCAT        | Beta_Lactamase | deactivate |
| blaPSE           | TTGTGACCTATTCCCCTGTAATAGAA | TGCGAAGCACGCATCATC           | Beta_Lactamase | deactivate |
| blaROB           | GCAAAGGCATGACGATTGC        | CGCGCTGTTGTCGCTAAA           | Beta_Lactamase | deactivate |
| blaSFO           | CCGCCGCCATCCAGTA           | GGGCCGCCAAGATGCT             | Beta_Lactamase | deactivate |



|           |                                  |                               |                |            |
|-----------|----------------------------------|-------------------------------|----------------|------------|
| blaSHV-01 | TCCCATGATGAGCACCTTTAAA           | TTCGTCACCGGCATCCA             | Beta_Lactamase | deactivate |
| blaSHV-02 | CTTTCCCATGATGAGCACCTTT           | TCCTGCTGGCGATAGTGGAT          | Beta_Lactamase | deactivate |
| blaTEM    | AGCATCTTACGGATGGCATGA            | TCCTCCGATCGTTGTCAGAAGT        | Beta_Lactamase | deactivate |
| blaTLA    | ACACTTTGCCATTGCTGTTTATGT         | TGCAAATTTTCGGCAATAATCTTT      | Beta_Lactamase | deactivate |
| blaVEB    | CCCGATGCAAAGCGTTATG              | GAAAGATTCCCTTTATCTATCTCAGACAA | Beta_Lactamase | deactivate |
| blaVIM    | GCACTTCTCGCGGAGATTG              | CGACGGTGATGCGTACGTT           | Beta_Lactamase | deactivate |
| blaZ      | GGAGATAAAGTAACAAATCCAGTTAGATATGA | TGCTTAATTTTCCATTTGCGATAAG     | Beta_Lactamase | deactivate |
| cepA      | AGTTGCGCAGAACAGTCCTCTT           | TCGTATCTTGCCCGTCGATAAT        | Beta_Lactamase | deactivate |
| cfiA      | GCAGCGTTGCTGGACACA               | GTTTCGGGATAAACGTGGTGACT       | Beta_Lactamase | deactivate |
| cfxA      | TCATTCCCTCGTTCAAGTTTTCAGA        | TGCAGCACCAAGAGGAGATGT         | Beta_Lactamase | deactivate |
| cphA-01   | GCGAGCTGCACAAGCTGAT              | CGGCCAGTCGCTCTTC              | Beta_Lactamase | deactivate |
| cphA-02   | GTGCTGATGGCGAGTTTCTG             | GGTGIGGTAGTTGGTGTGATCAC       | Beta_Lactamase | deactivate |
| fox5      | GGTTTGCCGCTGCAGTTC               | GCGGCCAGGTGACCAA              | Beta_Lactamase | deactivate |
| mecA      | GGTTACGGACAAGGTGAAATACTGAT       | TGTCTTTTAATAAGTGAGGTGCGTTAATA | Beta_Lactamase | protection |
| ndm-1     | ATTAGCCGCTGCATTGAT               | CATGTCGAGATAGGAAGTG           | Beta_Lactamase | eactivate  |
| pbp       | CCGGTGCCATTGGTTTAGA              | AAAATAGCCGCCCAAGATT           | Beta_Lactamase | protection |
| pbp2x     | TTTCATAAGTATCTGGACATGGAAGAA      | CCAAAGGAACTTGCTTGAGATTAG      | Beta_Lactamase | protection |
| Pbp5      | GGCGAACTTCTAATTAATCCTATCCA       | CGCCGATGACATTCTTCTTATCTT      | Beta_Lactamase | protection |
| penA      | AGACGGTAACGTATAACTTTTTGAAAGA     | GCGTGTAGCCGGCAATG             | Beta_Lactamase | protection |
| catA1     | GGGTGAGTTTACCAGTTTTGATT          | CACCTTGTCGCCTTGCGTATA         | FCA            | deactivate |
| catB3     | GCACTCGATGCCTTCCAAAA             | AGAGCCGATCCAAACGTCAT          | FCA            | deactivate |
| catB8     | CACTCGACGCCTTCCAAAG              | CCGAGCCTATCCAGACATCATT        | FCA            | deactivate |
| cfr       | GCAAAATTCAGAGCAAGTTACGAA         | AAAATGACTCCCAACCTGCTTTAT      | FCA            | deactivate |
| cmlA1-01  | TAGGAAGCATCGGAACGTTGAT           | CAGACCGAGCACGACTGTTG          | FCA            | efflux     |
| cmlA1-02  | AGGAAGCATCGGAACGTTGA             | ACAGACCGAGCACGACTGTTG         | FCA            | efflux     |

|            |                            |                               |                  |             |
|------------|----------------------------|-------------------------------|------------------|-------------|
| cmx(A)     | GCGATCGCCATCCTCTGT         | TCGACACGGAGCCTTGGT            | FCA              | efflux      |
| floR       | ATTGTCTTCACGGTGCCGTTA      | CCGCGATGTCGTCGAACT            | FCA              | efflux      |
| qnrA       | AGGATTTCTCACGCCAGGATT      | CCGCTTTCAATGAAACTGCAA         | FCA              | unknown     |
| cIntI-1    | GGCATCCAAGCAGCAAG          | AAGCAGACTTGACCTGA             | MGEs/Integrase   | integrase   |
| intI-1     | CGAACGAGTGGCGGAGGGTG       | TACCCGAGAGCTTGGCACCCA         | MGEs/Integrase   | integrase   |
| IS613      | AGGTTCGGACTCAATGCAACA      | TTCAGCACATAACGCCTTGAT         | MGEs/Transposase | transposase |
| tnpA-01    | CATCATCGGACGGACAGAATT      | GTCGGAGATGTGGGTGTAGAAAGT      | MGEs/Transposase | transposase |
| tnpA-02    | GGGCGGGTCGATTGAAA          | GTGGGCGGGATCTGCTT             | MGEs/Transposase | transposase |
| tnpA-03    | AATTGATGCGGACGGCTTAA       | TCACCAAAGTGTATGGAGTCGTT       | MGEs/Transposase | transposase |
| tnpA-04    | CCGATCACGAAAGCTCAAG        | GGCTCGCATGACTTCGAATC          | MGEs/Transposase | transposase |
| tnpA-05    | GCCGCACTGTCGATTTTTATC      | GCGGGATCTGCCACTTCTT           | MGEs/Transposase | transposase |
| tnpA-07    | GAAACCGATGCTACAATATCCAATTT | CAGCACCGTTTGCAGTGTAAG         | MGEs/Transposase | transposase |
| Tp614      | GGAAATCAACGGCATCCAGTT      | CATCCATGCGCTTTTGTCTCT         | MGEs/Transposase | transposase |
| carB       | GGAGTGAGGCTGACCGTAGAAG     | ATCGGCGAAACGCACAAA            | MLSB             | efflux      |
| ereA       | CCTGTGGTACGGAGAATTCATGT    | ACCGCATTGCTTTGCTT             | MLSB             | deactivate  |
| ereB       | GCTTTATTTACAGGAGGCGGAAT    | TTTTAAATGCCACAGCACAGAATC      | MLSB             | deactivate  |
| erm(34)    | GCGCGTTGACGACGATTT         | TGGTCATACTCGACGGCTAGAAC       | MLSB             | protection  |
| erm(35)    | TTGAAAACGATGTTGCATTAAGTCA  | TCTATAATCACAACCTAACCCTTGAACGT | MLSB             | protection  |
| erm(36)    | GGCGGACCGACTTGCAT          | TCTGCGTTGACGACGGTTAC          | MLSB             | protection  |
| ermA       | TTGAGAAGGGATTTGCGAAAAG     | ATATCCATCTCCACCATTAATAGTAAACC | MLSB             | protection  |
| ermA/ermTR | ACATTTTACCAAGGAACTTGTGGAA  | GTGGCATGACATAAACCTTCATCA      | MLSB             | protection  |
| ermB       | TAAAGGGCATTTAACGACGAAACT   | TTTATACCTCTGTTTGTAGGGAATTGAA  | MLSB             | protection  |
| ermC       | TTTGAAATCGGCTCAGGAAAA      | ATGGTCTATTTCAATGGCAGTTACG     | MLSB             | protection  |
| ermF       | CAGCTTTGGTTGAACATTTACGAA   | AAATTCCTAAAATCACAACCGACAA     | MLSB             | protection  |
| ermJ/ermD  | GGACTCGGCAATGGTCAGAA       | CCCCGAAACGCAATATAATGTT        | MLSB             | protection  |

|          |                                 |                               |      |            |
|----------|---------------------------------|-------------------------------|------|------------|
| ermK-01  | GTTTGATATTGGCATTGTCAGAGAAA      | ACCATTGCCGAGTCCACTTT          | MLSB | protection |
| ermK-02  | GAGCCGCAAGCCCCTTT               | GTGTTTCATTTGACGCGGAGTAA       | MLSB | protection |
| ermT-01  | GTTCACTAGCACTATTTTTAATGACAGAAGT | GAAGGGTGTCTTTTTAATACAATTAACGA | MLSB | protection |
| ermT-02  | GTAAAATCCCTAGAGAATACTTTCATCCA   | TGAGTGATATTTTTGAAGGGTGTCTT    | MLSB | protection |
| ermX     | GCTCAGTGGTCCCCATGGT             | ATCCCCCGTCAACGTTT             | MLSB | protection |
| ermY     | TTGTCTTTGAAAGTGAAGCAACAGT       | TAACGCTAGAGAACGATTTGTATTGAG   | MLSB | protection |
| lmrA-01  | TCGACGTGACCGTAGTGAACA           | CGTGACTACCCAGGTGAGTTGA        | MLSB | efflux     |
| lnuA-01  | TGACGCTCAACACACTCAAAAA          | TTCATGCTTAAGTTCCATACGTGAA     | MLSB | deactivate |
| lnuB-01  | TGAACATAATCCCCTCGTTTTAAAGAT     | TAATTGCCCTGTTTCATCGTAAATAA    | MLSB | deactivate |
| lnuB-02  | AAAGGAGAAGGTGACCAATACTCTGA      | GGAGCTACGTCAAACAACCAGTT       | MLSB | deactivate |
| lnuC     | TGGTCAATATAACAGATGTAAACCAGATTT  | CACCCCAGCCACCATCAA            | MLSB | deactivate |
| matA/mel | TAGTAGGCAAGCTCGGTGTTGA          | CCTGTGCTATTTTAAGCCTTGTTTTCT   | MLSB | efflux     |
| mdtA     | CCTAACGGGCGTGACTTCA             | TTCACCTGTTTCAAGGGTCAA         | MLSB | efflux     |
| mefA     | CCGTAGCATTGGAACAGCTTTT          | AAACGGAGTATAAGAGTGCTGCAA      | MLSB | efflux     |
| mphA-01  | CTGACGCGCTCCGTGTT               | GGTGGTGCATGGCGATCT            | MLSB | deactivate |
| mphA-02  | TGATGACCCTGCCATCGA              | TTCGCGAGCCCCCTCTTC            | MLSB | deactivate |
| mphB     | CGCAGCGCTTGATCTTGTAG            | TACTGCATCCATACGCTGCTT         | MLSB | deactivate |
| mphC     | CGTTTGAAGTACCGAATTGGAAA         | GCTGCGGGTTTGCCTGTA            | MLSB | deactivate |
| msrA-01  | CTGCTAACACAAGTACGATTCCAAAT      | TCAAGTAAAGTTGTCTTACCTACACCATT | MLSB | efflux     |
| msrC-01  | TCAGACCGGATCGGTTGTC             | CCTATTTTTTGGAGTCTTCTCTAATGTT  | MLSB | efflux     |
| oleC     | CCCGGAGTCGATGTTCGA              | GCCGAAGACGTACACGAACAG         | MLSB | efflux     |
| pikR1    | TCGACATGCGTGACGAGATT            | CCGCGAATTAGGCCAGAA            | MLSB | protection |
| pikR2    | TCGTGGGCCAGGTGAAGA              | TCCCCCTTGCCGGTGAA             | MLSB | protection |
| vatB-01  | GGAAAAAGCAACTCCATCTCTTGA        | TCCTGGCATAACAGTAACATTCTGA     | MLSB | deactivate |
| vatB-02  | TTGGGAAAAAGCAACTCCATCT          | CAATCCACACATCATTTCCAACA       | MLSB | deactivate |

|         |                              |                                |           |            |
|---------|------------------------------|--------------------------------|-----------|------------|
| vatC-01 | CGGAAATTGGGAACGATGTT         | GCAATAATAGCCCCGTTTCCTA         | MLSB      | deactivate |
| vatC-02 | CGATGTTTGGATTGGACGAGAT       | GCTGCAATAATAGCCCCGTTT          | MLSB      | deactivate |
| vatE-01 | GGTGCCATTATCGGAGCAAAT        | TTGGATTGCCACCGACAAT            | MLSB      | deactivate |
| vatE-02 | GACCGTCCTACCAGGCGTAA         | TTGGATTGCCACCGACAATT           | MLSB      | deactivate |
| vgaA-01 | CGAGTATTGTGGAAAGCAGCTAGTT    | CCCGTACCGTTAGAGCCGATA          | MLSB      | efflux     |
| vgaA-02 | GACGGGTATTGTGGAAAGCAA        | TTTCCTGTACCATTAGATCCGATAATT    | MLSB      | efflux     |
| vgb-01  | AGGGAGGGTATCCATGCAGAT        | ACCAAATGCGCCCGTTT              | MLSB      | deactivate |
| vgbB-01 | CAGCCGGATTCTGGTCCTT          | TACGATCTCCATTCAATTGGGTAAA      | MLSB      | efflux     |
| vgbB-02 | ATACGAGCTGCCTAATAAAGGATCTT   | TGTGAACCACAGGGCATTATCA         | MLSB      | deactivate |
| acrA-01 | CAACGATCGGACGGGTTTC          | TGGCGATGCCACCGTACT             | Multidrug | efflux     |
| acrA-02 | GGTCTATCACCTACGCGCTATC       | GCGCGCACGAACATAACC             | Multidrug | efflux     |
| acrA-03 | CAGACCCGCATCGCATATT          | CGACAATTTGCGGCTCATG            | Multidrug | efflux     |
| acrA-04 | TACTTTGCGCGCCATCTTC          | CGTGCGGAACGAACAT               | Multidrug | efflux     |
| acrA-05 | CGTGCGGAACGAACA              | ACTTTGCGGCCATCTTC              | Multidrug | efflux     |
| acrB-01 | AGTCGGTGTTCCCGTTAAC          | CAAGGAAACGAACGCAATACC          | Multidrug | efflux     |
| acrF    | GCGGCCAGGCACAAAA             | TACGCTCTCCCACGGTTTC            | Multidrug | efflux     |
| acrR-01 | GCGCTGGAGACACGACAAC          | GCCTTGCTGCGAGAACAAA            | Multidrug | efflux     |
| acrR-02 | GATGATACCCCCTGCTGTGAGA       | ACCAAACAAGAAGCGCAAGAA          | Multidrug | efflux     |
| adeA    | CAGTTCGAGCGCCTATTTCTG        | CGCCCTGACCGACCAAT              | Multidrug | efflux     |
| ceoA    | ATCAACACGGACCAGGACAAG        | GGAAAGTCCGCTCACGATGA           | Multidrug | efflux     |
| cmeA    | GCAGCAAAGAAGAAGCACCAA        | AGCAGGGTAAGTAAACTAAGTGGTAAATCT | Multidrug | efflux     |
| cmr     | CGGCATCGTCAGTGGAAATT         | CGGTTCCGAAAAAGATGGAA           | Multidrug | efflux     |
| emrD    | CTCAGCAGTATGGTGGTAAGCATT     | ACCAGGCGCCGAAGAAC              | Multidrug | efflux     |
| marR-01 | GCGGCGTACTGGTGAAGCTA         | TGCCCTGGTCGTTGATGA             | Multidrug | efflux     |
| mdet1   | ATACAGCAGTGGATATTGGTTTAATTGT | TGCATAAGGTGAATGTTCCATGA        | Multidrug | efflux     |

|                    |                                |                             |           |        |
|--------------------|--------------------------------|-----------------------------|-----------|--------|
| mdtE/yhiU          | CGTCGGCGCACTCGTT               | TCCAGACGTTGTACGGTAACCA      | Multidrug | efflux |
| mepA               | ATCGGTCGCTCTTCGTTAC            | ATAAATAGGATCGAGCTGCTGGAT    | Multidrug | efflux |
| mexA               | AGGACAACGCTATGCAACGAA          | CCGGAAAGGGCCGAAAT           | Multidrug | efflux |
| mexD               | TTGCCACTGGCTTTCATGAG           | CACTGCGGAGAAGTGTCTGTAGA     | Multidrug | efflux |
| mexE               | GGTCAGCACCGACAAGGTCTAC         | AGCTCGACGTAAGTGTGAGAACAC    | Multidrug | efflux |
| mexF               | CCGCGAGAAGGCCAAGA              | TTGAGTTCGGCGGTGATGA         | Multidrug | efflux |
| mtrC-01            | GGACGGGAAGATGGTCCAA            | CGTAGCGTTCGGTTCGAT          | Multidrug | efflux |
| mtrC-02            | CGGAGTCCATCGACCATTG            | ATCGTCGGCAAGGAGAATCA        | Multidrug | efflux |
| mtrD-02            | GGTCGGCACGCTCTTGTC             | TGAAGAATTTGCGCACCCTAC       | Multidrug | efflux |
| mtrD-03            | CCGCCAAGCCGATATAGACA           | GGCCGGGTTGCCAAA             | Multidrug | efflux |
| oprD               | ATGAAGTGGAGCGCCATTG            | GGCCACGGCGAACTGA            | Multidrug | efflux |
| oprJ               | ACGAGAGTGGCGTCGACAA            | AAGGCGATCTCGTTGAGGAA        | Multidrug | efflux |
| pmrA               | TTTGCAGTTTTTGTTCCTAATGC        | GCAGAGCCTGATTTCTCCTTTG      | Multidrug | efflux |
| putitive multidrug | AATTTTGCCGATTATTGCTGAAA        | GATTGTCATCATTCGTTTATCACCAA  | Multidrug | efflux |
| qac                | CAATAATAACCGAAATAATAGGGACAAGTT | AATAAGTGTTCTTAGTGTGGCCATAG  | Multidrug | efflux |
| qacA               | TGGCAATAGGAGCTATGGTGTTT        | AAGGTAACACTATTTTCGGTCCAAATC | Multidrug | efflux |
| qacA/qacB          | TTTAGGCAGCCTCGCTTCA            | CCGAATCCAAATAAAACCCAATAA    | Multidrug | efflux |
| qacEdelta1-01      | TCGCAACATCCGCATTAATAA          | ATGGATTTTCAGAACCAGAGAAAGAAA | Multidrug | efflux |
| qacEdelta1-02      | CCCCTTCCGCCGTTGT               | CGACCAGACTGCATAAGCAACA      | Multidrug | efflux |
| qacH-01            | GTGGCAGCTATCGCTTGGAT           | CCAACGAACGCCCAACA           | Multidrug | efflux |
| qacH-02            | CATCGTGCTTGTGGCAGCTA           | TGAACGCCCAGAAGTCTAGTTTT     | Multidrug | efflux |
| rarD-02            | TGACGCATCGCGTGATCT             | AAATTTTCTGTGGCGTCTGAATC     | Multidrug | efflux |
| sdeB               | CACTACCGCTTCCGCACTTAA          | TGAAAAAACGGGAAAAGTCCAT      | Multidrug | efflux |
| tolC-01            | GGCCGAGAACCTGATGCA             | AGACTTACGCAATTCGGGTTA       | Multidrug | efflux |
| tolC-02            | CAGGCAGAGAACCTGATGCA           | CGCAATTCGGGTTGCT            | Multidrug | efflux |

|              |                                |                              |                       |            |
|--------------|--------------------------------|------------------------------|-----------------------|------------|
| tolC-03      | GCCAGGCAGAGAACCTGATG           | CGCAATCCGGGTTGCT             | Multidrug             | efflux     |
| ttgA         | ACGCCAATGCCAAACGATT            | GTCACGGCGCAGCTTGA            | Multidrug             | efflux     |
| ttgB         | TCGCCCTGGATGTACACCTT           | ACCATTGCCGACATCAACAAC        | Multidrug             | efflux     |
| yceE/mdtG-01 | TGGCACAAAATATCTGGCAGTT         | TTGTGTGGCGATAAGAGCATTAG      | Multidrug             | efflux     |
| yceE/mdtG-02 | TTATCTGTTTTCTGCTCACCTTCTTTT    | GCGTGGTGACAAACAGGCTTA        | Multidrug             | efflux     |
| yceL/mdtH-01 | TCGGGATGGTGGGCAAT              | CGATAACCGAGCCGATGTAGA        | Multidrug             | efflux     |
| yceL/mdtH-02 | CGCGTGAAACCTTAAGTGCTT          | AGACGGCTAAACCCCATATAGCT      | Multidrug             | efflux     |
| yceL/mdtH-03 | CTGCCGTAAATGGATGTATGC          | ACTCCAGCGGGCGATAGG           | Multidrug             | efflux     |
| yidY/mdtL-01 | GCAGTTGCATATCGCCTTCTC          | CTTCCCGCAAACAGCAT            | Multidrug             | efflux     |
| yidY/mdtL-02 | TGCTGATCGGGATTCTGATTG          | CAGGCGCGACGAACATAAT          | Multidrug             | efflux     |
| fabK         | TTTCAGCTCAGCACTTGGTCAT         | AAGGCATCTTTTTTCAGCCAGTTC     | Others                | deactivate |
| imiR         | CCGGACTAGAGCTTCATGTAAGC        | CCCACGCGGTACTCTTGTAAG        | Others                | unknown    |
| nisB         | GGGAGAGTTGCCGATGTTGTA          | AGCCACTCGTTAAAGGGCAAT        | Others                | unknown    |
| speA         | GCAAGAGGTATTTGCTCAACAAGA       | CAGGGTCACCCTCATAAAGAAAA      | Others                | unknown    |
| bacA-01      | CGGCTTCGTGACCTCGTT             | ACAATGCGATACCAGGCAAAT        | Others/bacitracin     | deactivate |
| bacA-02      | TTCCACGACACGATTAAGTCATTG       | CGGCTCTTTCGGCTTCAG           | Others/bacitracin     | deactivate |
| fosB         | TCACTGTAATAATGAAGCATTAGACCAT   | CCATCTGGATCTGTAAAGTAAAGAGATC | Others/fosfomycin     | deactivate |
| fosX         | GATTAAGCCATATCACTTTAATTGTGAAAG | TCTCCTTCCATAATGCAAATCCA      | Others/fosfomycin     | deactivate |
| nimE         | TGCGCCAAGATAGGGCATA            | GTCGTGAATTTCGGCAGGTTTA       | Others/nitroimidazole | unknown    |
| pncA         | GCAATCGAGGCGGTGTTT             | TTGCCGCAGCCAATTCA            | Others/Pyrazinamide   | unknown    |
| sat4         | GAATGGGCAAAGCATAAAAACTTG       | CCGATTTTGAAACCACAATTATGATA   | Others/streptothricin | deactivate |
| dfrA1        | GGAATGGCCCTGATATTCCA           | AGTCTTGCGTCCAACCAACAG        | Sulfonamides          | deactivate |
| dfrA12       | CCTCTACCGAACCGTCACACA          | GCGACAGCGTTGAAACAACACTAC     | Sulfonamides          | deactivate |
| folA         | CGAGCAGTTCCTGCCAAAG            | CCCAGTCATCCGGTTCATAATC       | Sulfonamides          | deactivate |
| sulI         | CAGCGCTATGCGCTCAAG             | ATCCCGCTGCGCTGAGT            | Sulfonamides          | protection |

|              |                               |                               |               |            |
|--------------|-------------------------------|-------------------------------|---------------|------------|
| sul2         | TCATCTGCCAAACTCGTCGTTA        | GTCAAAGAACGCCGCAATGT          | Sulfonamides  | protection |
| sulA/foIP-01 | CAGGCTCGTAAATTGATAGCAGAAG     | CTTTCCTTGCGAATCGCTTT          | Sulfonamides  | protection |
| sulA/foIP-03 | CACGGCTTCGGCTCATGT            | TGCCATCCTGTGACTAGCTACGT       | Sulfonamides  | protection |
| tet(32)      | CCATTACTTCGGACAACGGTAGA       | CAATCTCTGTGAGGGCATTTAACA      | Tetracyclines | protection |
| tet(34)      | CTTAGCGCAAACAGCAATCAGT        | CGGTGATACAGCGCGTAAACT         | Tetracyclines | unknown    |
| tet(35)      | ACCCCATGACGTACCTGTAGAGA       | CAACCCACACTGGCTACCAGTT        | Tetracyclines | unknown    |
| tet(36)-01   | AGAATACTCAGCAGAGGTCAGTTCCT    | TGGTAGGTCGATAACCCGAAAAT       | Tetracyclines | protection |
| tet(36)-02   | TGCAGGAAAGACCTCCATTACAG       | CTTTGTCCACACTTCCACGTACTATG    | Tetracyclines | protection |
| tet(37)      | GAGAACGTTGAAAAGGTGGTGAA       | AACCAAGCCTGGATCAGTCTCA        | Tetracyclines | unknown    |
| tetA-01      | GCTGTTTGTCTGCCGAAA            | GGTTAAGTTCCTTGAACGCAAAC       | Tetracyclines | efflux     |
| tetA-02      | CTCACCAGCCTGACCTCGAT          | CACGTTGTTATAGAAGCCGCATAG      | Tetracyclines | efflux     |
| tetB-01      | AGTGCGCTTTGGATGCTGTA          | AGCCCCAGTAGCTCCTGTGA          | Tetracyclines | efflux     |
| tetB-02      | GCCCAGTGCTGTTGTTGTCAT         | TGAAAGCAAACGGCCTAAATACA       | Tetracyclines | efflux     |
| tetC-01      | CATATCGCAATACATGCGAAAAA       | AAAGCCGCGGTAAATAGCAA          | Tetracyclines | efflux     |
| tetC-02      | ACTGGTAAGGTAAACGCCATTGTC      | ATGCATAAACCCAGCCATTGAGTAAG    | Tetracyclines | efflux     |
| tetD-01      | TGCCGCGTTTGATTACACA           | CACCAGTGATCCCGGAGATAA         | Tetracyclines | efflux     |
| tetD-02      | TGTCATCGCGCTGGTGATT           | CATCCGCTTCCGGGAGAT            | Tetracyclines | efflux     |
| tetE         | TTGGCGCTGTATGCAATGAT          | CGACGACCTATGCGATCTGA          | Tetracyclines | efflux     |
| tetG-01      | TCAACCATTGCCGATTCGA           | TGGCCCCGCAATCATG              | Tetracyclines | efflux     |
| tetG-02      | CATCAGCGCCGGTCTTATG           | CCCCATGTAGCCGAACCA            | Tetracyclines | efflux     |
| tetH         | TTTGGGTCATCTTACCAGCATTAA      | TTGCGCATTATCATCGACAGA         | Tetracyclines | efflux     |
| tetJ         | GGGTGCCGCATTAGATTACCT         | TCGTCCAATGTAGAGCATCCATA       | Tetracyclines | efflux     |
| tetK         | CAGCAGTCATTGAAAATTATCTGATTATA | CCTTGTACTAACCTACCAAAAATCAAATA | Tetracyclines | efflux     |
| tetL-01      | AGCCCGATTTATTCAAGGAATTG       | CAAATGCTTTCCCCCTGTTCT         | Tetracyclines | efflux     |
| tetL-02      | ATGGTTGTAGTTGCGCGCTATAT       | ATCGCTGGACCGACTCCTT           | Tetracyclines | efflux     |

|             |                                    |                               |               |            |
|-------------|------------------------------------|-------------------------------|---------------|------------|
| tetM-01     | CATCATAGACACGCCAGGACATAT           | CGCCATCTTTTGCAGAAATCA         | Tetracyclines | protection |
| tetM-02     | TAATATTGGAGTTTTAGCTCATGTTGATG      | CCTCTCTGACGTTCTAAAAGCGTATTAT  | Tetracyclines | protection |
| tetO-01     | ATGTGGATACTACAACGCATGAGATT         | TGCTCCACATGATATTTTTCT         | Tetracyclines | protection |
| tetPA       | AGTTGCAGATGTGTATAGTCGTAAACTATCTATT | TGCTACAAGTACGAAAACAAAAGTAGAA  | Tetracyclines | efflux     |
| tetPB-01    | ACACCTGGACACGCTGATTTT              | ACCGTCTAGAACGCGGAATG          | Tetracyclines | protection |
| tetPB-02    | TGATACACCTGGACACGCTGAT             | CGTCCAAAACGCGGAATG            | Tetracyclines | protection |
| tetPB-03    | TGGGCGACAGTAGGCTTAGAA              | TGACCCACTGAAACATTAGAAATATACCT | Tetracyclines | protection |
| tetPB-04    | AGTGGTGCAAATACTGAAAAAGTTGT         | TTTGTTCCTTCGTTTTGGACAGA       | Tetracyclines | protection |
| tetPB-05    | CTGAAGTGGAGCGATCATTC               | CCCTCAACGGCAGAAATAACTAA       | Tetracyclines | protection |
| tetQ        | CGCCTCAGAAGTAAGTTCATACACTAAG       | TCGTTTCATGCGGATATTATCAGAAT    | Tetracyclines | protection |
| tetR-02     | CGCGATAGACGCCTTCGA                 | TCCTGACAACGAGCCTCCTT          | Tetracyclines | efflux     |
| tetR-03     | CGCGATGGAGCAAAAGTACAT              | AGTGAAAAACCTTGTTGGCATAAAA     | Tetracyclines | efflux     |
| tetS        | TTAAGGACAAACTTTCTGACGACATC         | TGTCTCCATTGTTCTGGTTCA         | Tetracyclines | protection |
| tetT        | CCATATAGAGGTTCCACCAAATCC           | TGACCCATTGGTAGTGGTTCTATTG     | Tetracyclines | protection |
| tetU-01     | GTGGCAAAGCAACGGATTG                | TGCGGGCTTGCAAAACTATC          | Tetracyclines | unknown    |
| tetV        | GCGGGAACGACGATGTATATC              | CCGCTATCTCACGACCATGAT         | Tetracyclines | efflux     |
| tetX        | AAATTTGTTACCGACACGGAAGTT           | CATAGCTGAAAAAATCCAGGACAGTT    | Tetracyclines | unknown    |
| vanA        | AAAAGGCTCTGAAAACGCAGTTAT           | CGGCCGTTATCTTGTA AAAACAT      | Vancomycin    | protection |
| vanB-01     | TTGTCGGCGAAGTGGATCA                | AGCCTTTTTCCGGCTCGTT           | Vancomycin    | protection |
| vanB-02     | CCGGTCGAGGAACGAAATC                | TCCTCTGCAAAAAAAGATCAAC        | Vancomycin    | protection |
| vanC-01     | ACAGGGATTGGCTATGAACCAT             | TGACTGGCGATGATTTGACTATG       | Vancomycin    | protection |
| vanC-03     | AAATCAATACTATGCCGGGCTTT            | CCGACCGCTGCCATCA              | Vancomycin    | protection |
| vanC1       | AGGCGATAGCGGGTATTGAA               | CAATCGTCAATTGCTCATTTC         | Vancomycin    | protection |
| vanC2/vanC3 | TTTACTGTCCGGTCTTGTGA               | TCAATCGTTTCAGGCAATGG          | Vancomycin    | protection |
| vanG        | ATTTGAATTGGCAGGTATACAGGTTA         | TGATTTGTCTTTGTCCATACATAATGC   | Vancomycin    | protection |



|          |                            |                             |            |            |
|----------|----------------------------|-----------------------------|------------|------------|
| vanHB    | GAGGTTTCCGAGGCGACAA        | CTCTCGGCGGCAGTCGTAT         | Vancomycin | protection |
| vanHD    | GTGGCCGATTATACCGTCATG      | CGCAGGTCATTCAGGCAAT         | Vancomycin | protection |
| vanRA-01 | CCCTTACTCCCACCGAGTTTT      | TTCGTCGCCCCATATCTCAT        | Vancomycin | protection |
| vanRA-02 | CCACTCCGGCCTTGTCATT        | GCTAACCACATTCCCCTTGTTTT     | Vancomycin | protection |
| vanRB    | GCCCTGTCGGATGACGAA         | TTACATAGTCGTCTGCCTCTGCAT    | Vancomycin | protection |
| vanRC    | TGCGGGAAAACTGAACGA         | CCCCCATAACGGTTTTGATTA       | Vancomycin | protection |
| vanRC4   | AGTGCTTTGGCTTATCTCGAAAA    | TCCGGCAGCATCACATCTAA        | Vancomycin | protection |
| vanRD    | TTATAATGGCAAGGATGCACTAAAGT | CGTCTACATCCGGAAGCATGA       | Vancomycin | protection |
| vanSA    | CGCGTCATGCTTTCAAATTC       | TCCGCAGAAAGCTCAATTTGTT      | Vancomycin | protection |
| vanSB    | GCGCGCAAATGACAAC           | TTTGCCATTTTATTCGCACTGT      | Vancomycin | protection |
| vanSC-02 | GCCATCAGCGAGTCTGATGA       | CAGCTGGGATCGTTTTTCCTT       | Vancomycin | protection |
| vanSE    | TGGCCGAAGAAGCAGGAA         | CAATAATACTCGTCAAAGGAGTTCTCA | Vancomycin | protection |
| vanTC-01 | CACACGCATTTTTTCCCATCTAG    | CAGCCAACAGATCATCAAAACAA     | Vancomycin | protection |
| vanTC-02 | ACAGTTGCCGCTGGTGAAG        | CGTGGCTGGTCGATCAAAA         | Vancomycin | protection |
| vanTE    | GTGGTGCCAAGGAAGTTGCT       | CGTAGCCACCGCAAAAAAAT        | Vancomycin | protection |
| vanTG    | CGTGTAGCCGTTCCGTTCTT       | CGGCATTACAGGTATATCTGGAAA    | Vancomycin | protection |
| vanWB    | CGGACAAAGATACCCCCTATAAAG   | AAATAGTAAATTGCTCATCTGGCACAT | Vancomycin | protection |
| vanWG    | ACATTTTCATTTTGGCAGCTTGAC   | CCGCCATAAGAGCCTACAATCT      | Vancomycin | protection |
| vanXA    | CGCTAAATATGCCACTTGGGATA    | TCAAAAGCGATTCAGCCAACCT      | Vancomycin | protection |
| vanXB    | AGGCACAAAATCGAAGATGCTT     | GGGTATGGCTCATCAATCAACTT     | Vancomycin | protection |
| vanXD    | TAAACCGTGTTATGGGAACGAA     | GCGATAGCCGTCCATAAGA         | Vancomycin | protection |
| vanYB    | GGCTAAAGCGGAAGCAGAAA       | GATATCCACAGCAAGACCAAGCT     | Vancomycin | protection |
| vanYD-01 | AAGGCGATACCCTGACTGTCA      | ATTGCCGACGGAAGCA            | Vancomycin | protection |
| vanYD-02 | CAAACGGAAGAGAGGTCACTTACA   | CGGACGGTAATAGGGACTGTTC      | Vancomycin | protection |

Fig. S1. The number of ARGs and MGEs that can be detected using 295 primer sets.

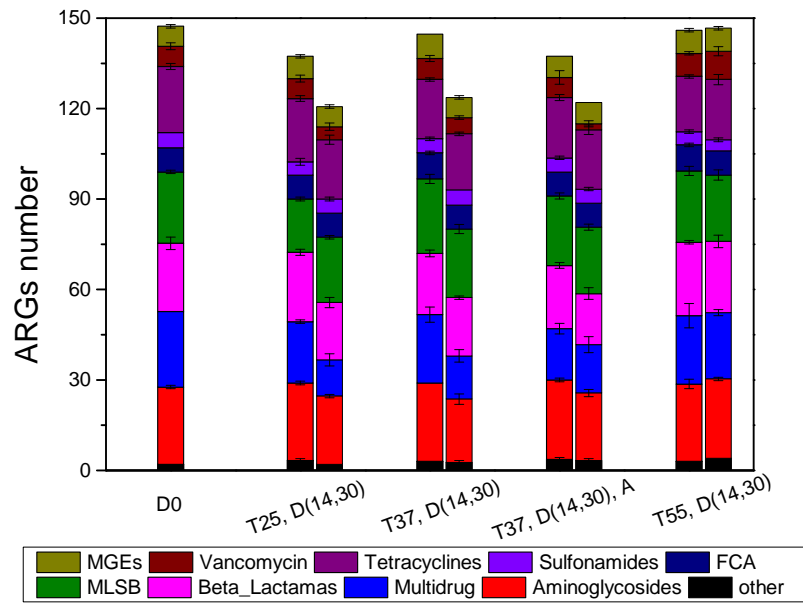

Fig. S2. Average log removal of ARG types and MGEs on days 14 and 30 compared to day 0. *IntI*: integrase genes; *Tn*: transposase genes. The number in the cell indicates the log removal.

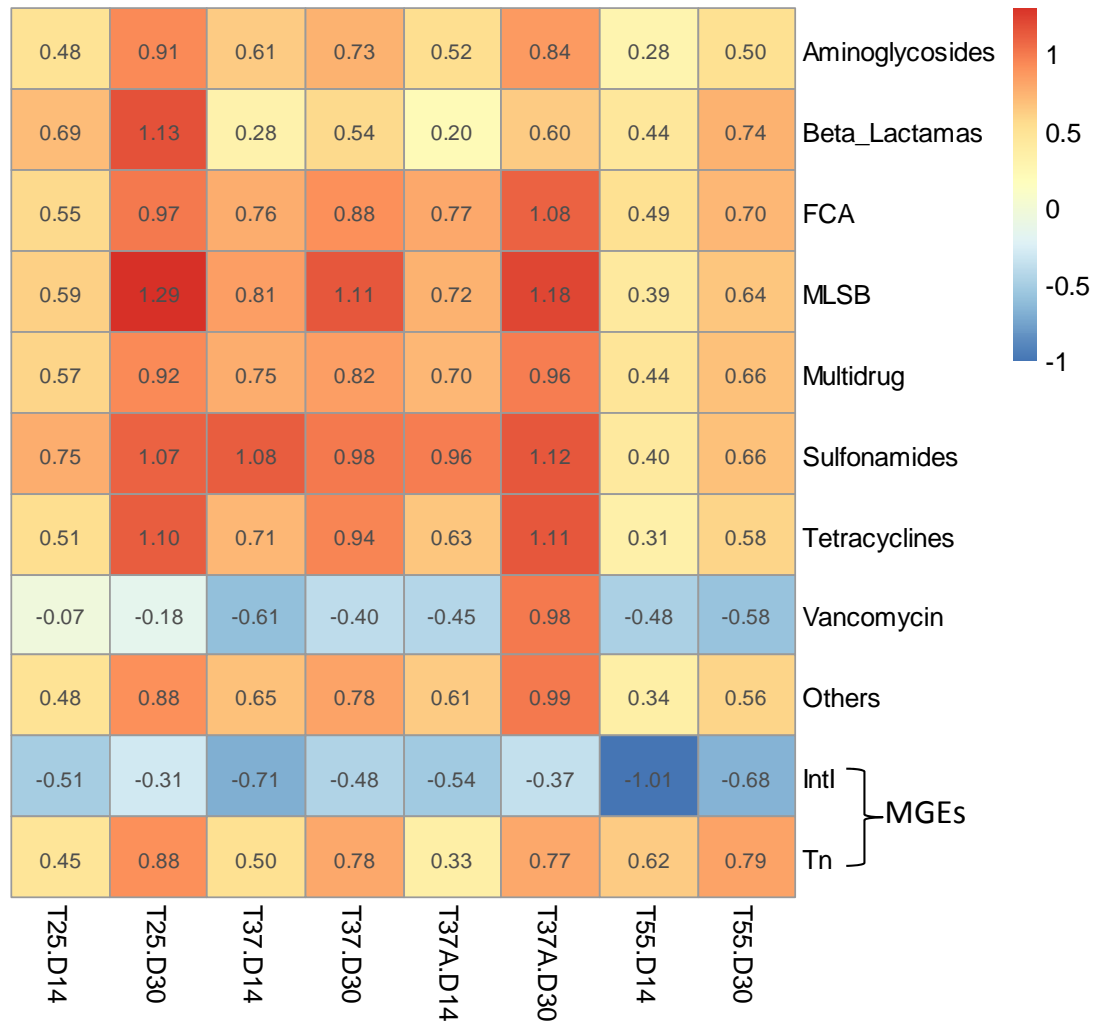

Fig.S3. The alpha-diversity indices of microbial communities in the samples collected from different days.

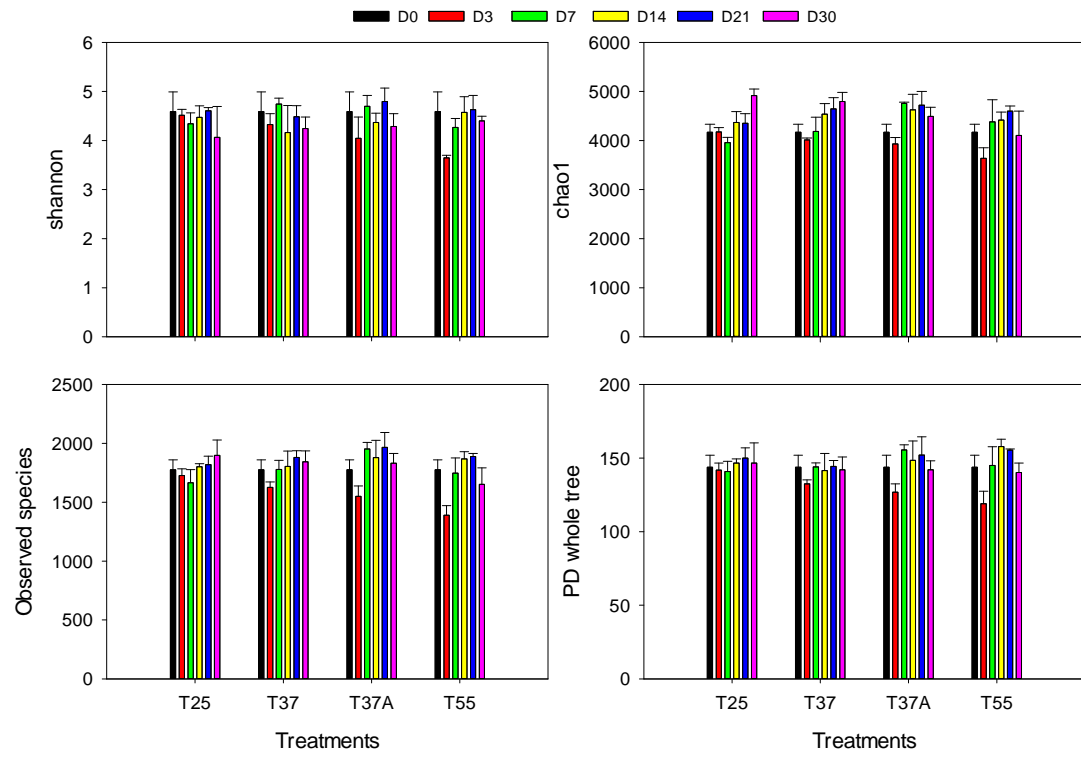

Fig. S4. Principal component analysis (PCA) based on the euclidean distance showing the overall distribution pattern of microbial communities in all treatments.

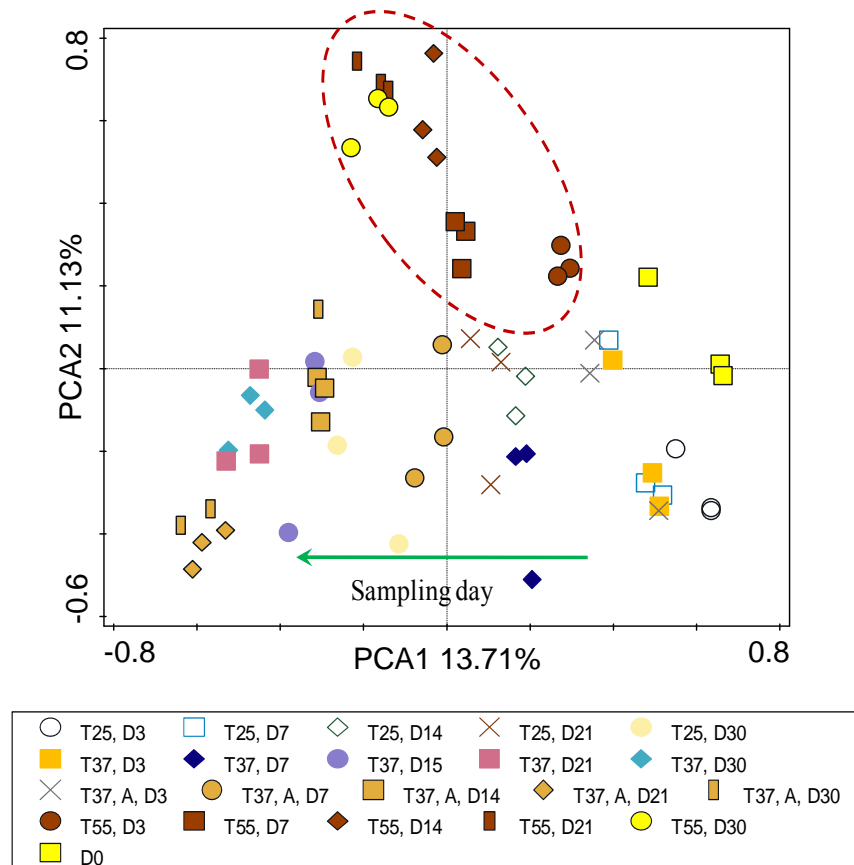

Fig. S5. Variation of bacterial and archaeal phyla in manure slurry during anaerobic digestion.

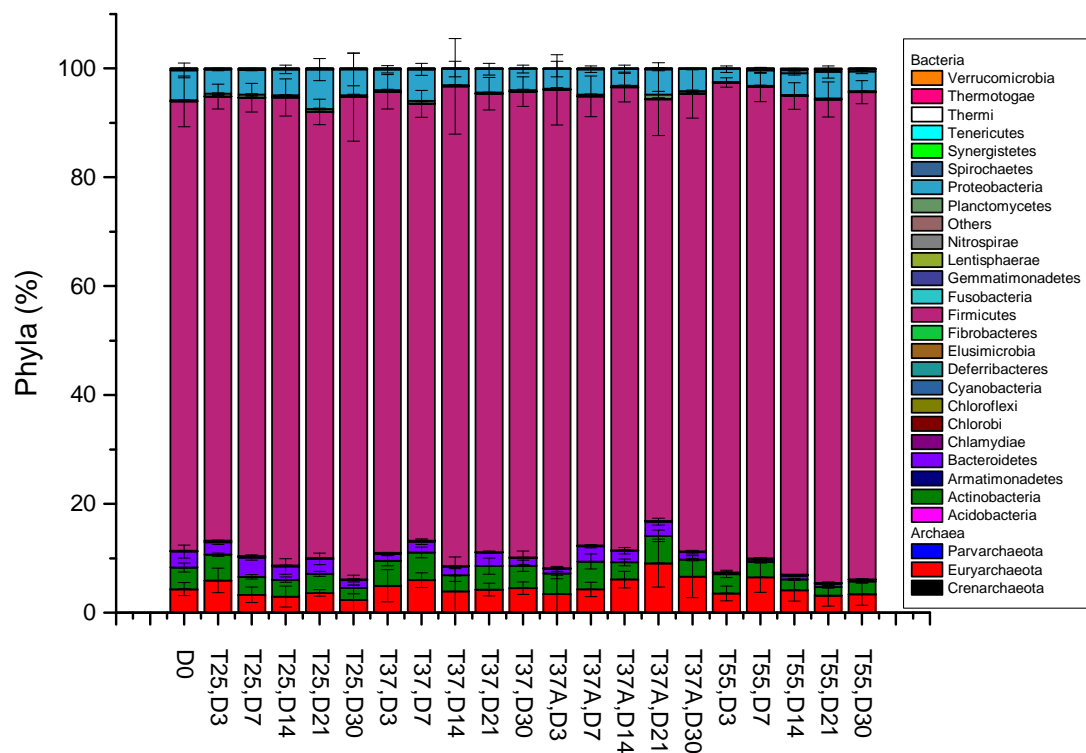

Fig. S6. The detection frequencies (%) of potential pathogenic bacteria during anaerobic digestion in this study based on the information on website <http://www.mgc.ac.cn/cgi-bin/VFs/jsif/main.cgi>.

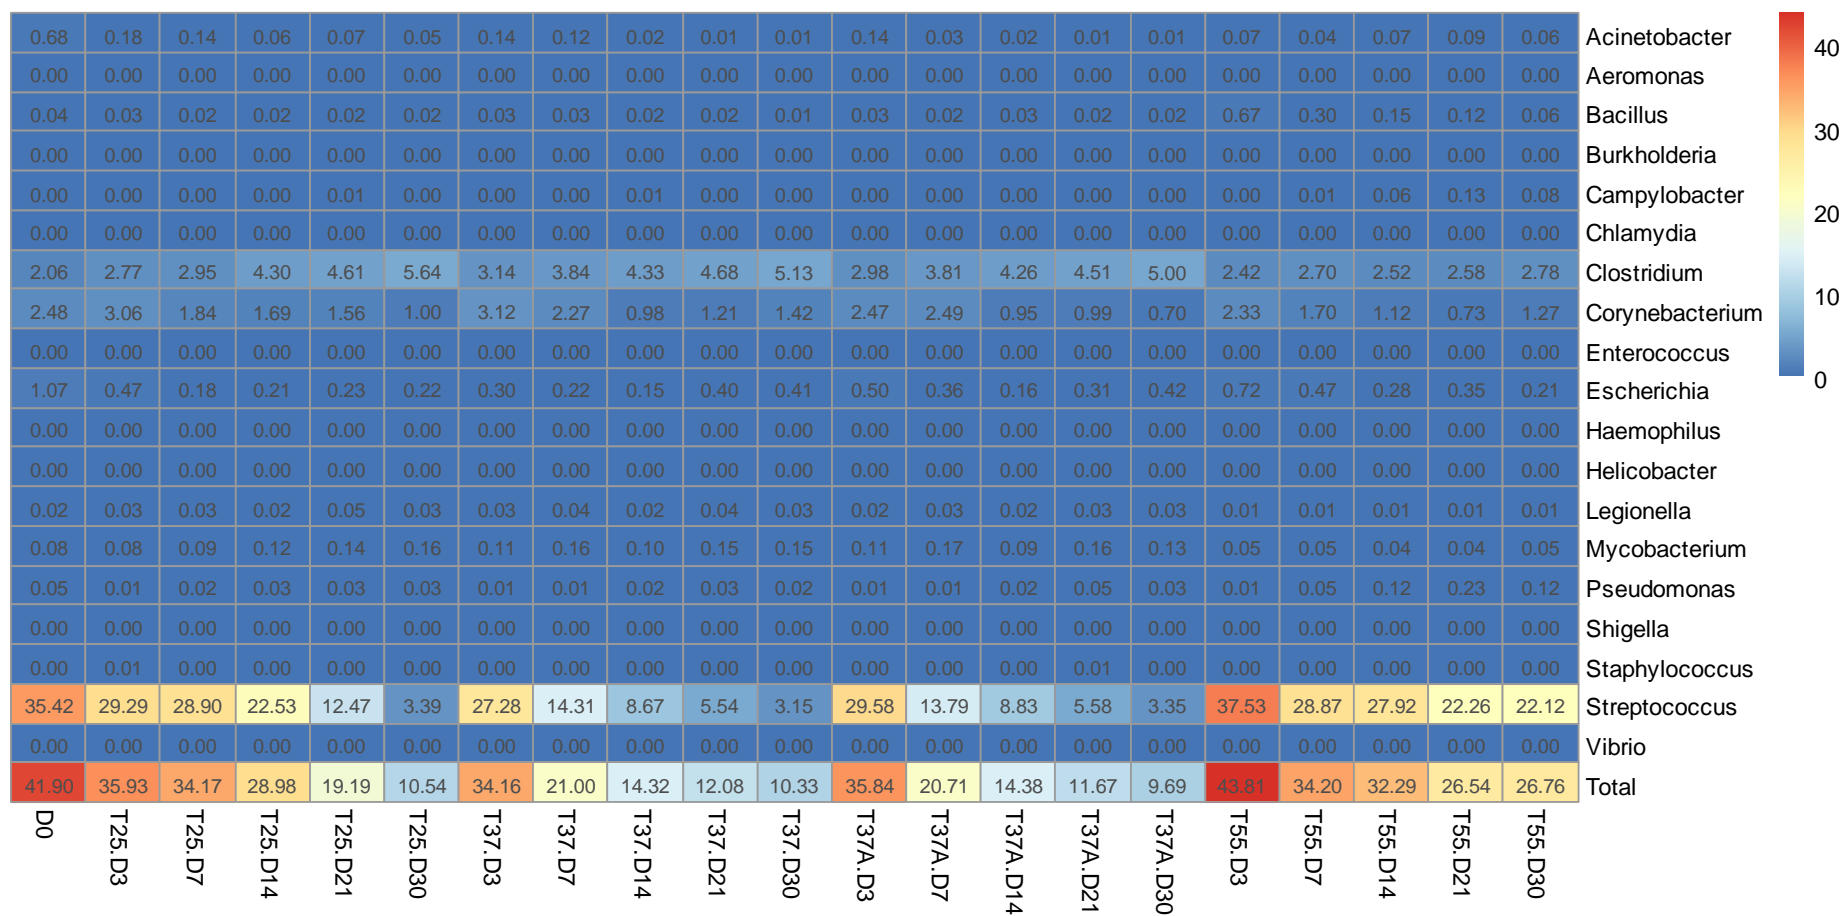

Fig. S7. Dynamics of OTC, SM2 and CIP in manure slurry of antibiotic-spiking treatment (T37A) during anaerobic digestion. (A) Antibiotic concentrations in supernatant. (B) Antibiotic concentrations in pellet. (C) Total concentrations calculated from those in supernatant and pellet.

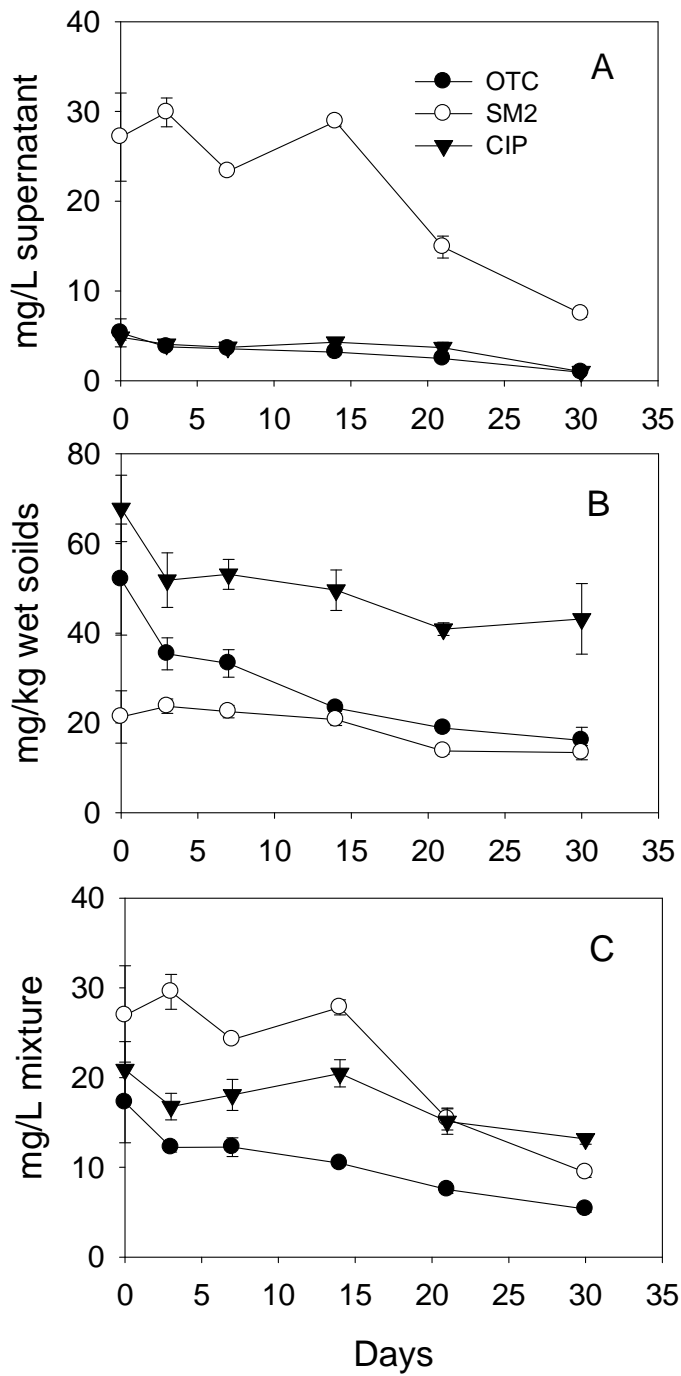



Fig. S8. Schematic description of anaerobic digestion experimental setup.

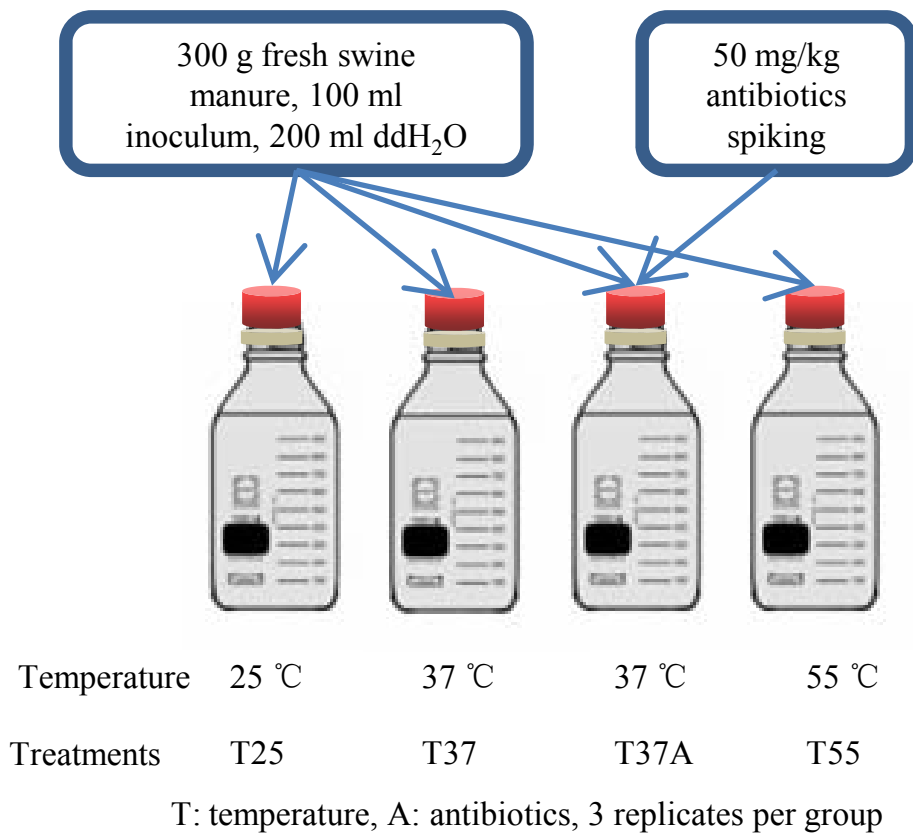

Supplement: AEM.02878-18-s0001.pdf [file AEM.02878-18-s0001.pdf]
